# Supplementary material for: Identification of Ixodes ricinus blood meals using an automated protocol with high resolution melting analysis (HRMA) reveals the importance of domestic dogs as larval tick hosts in Italian alpine forests
Source: Springer Nature journal article supplement (doi:10.1186/s13071-016-1901-y), 2016-12-01
Supplement: MOESM1 [file 13071_2016_1901_MOESM1_ESM.pdf]

## Additional file 1.

Table: melting temperatures for amplicons obtained from questing ticks DNA extracted using the KingFisher Cell and Tissue kit.  $T_m1$ . melting temperature peak 1;  $T_m2$ . melting temperature peak 2 (if present). In bold are newly added hosts species for the primer set, identified by sequencing because of deviating melting pattern.

| Host-group primer set | Amplified host species            | $T_m1$                           |       |        | $T_m2$ |       |       |
|-----------------------|-----------------------------------|----------------------------------|-------|--------|--------|-------|-------|
|                       |                                   | min                              | max   | mean   | min    | max   | mean  |
| <b>Canidae</b>        | <i>C. l. familiaris</i>           | 80.86                            | 81.56 | 81.4   | -      | -     | -     |
|                       | <i>V. vulpes</i>                  | 81.34                            | 82.04 | 81.68  | 83.54  | 84.2  | 83.74 |
| <b>Cervidae</b>       | <i>C. capreolus</i>               | 81.36                            | 81.76 | 81.59  | 83     | 83.5  | 83.21 |
|                       | <i>C. elaphus</i>                 | 81.5                             | 82.44 | 81.86  | 83.74  | 84.2  | 84    |
|                       | <b><i>Ovis sp.</i></b>            | 81.96                            | 82.16 | 82.05  | 83.4   | 83.9  | 83.75 |
|                       | <b><i>D. dama</i></b>             | na                               | na    | 81.66  | na     | na    | 83.64 |
|                       | <b><i>R. rupicapra</i></b>        | 81.8                             | 81.9  | 81.85  | 83.5   | 83.64 | 83.57 |
| <b>Passeriformes</b>  | <i>T. merula</i>                  | 84.2                             | 85.34 | 84.9   | -      | -     | -     |
|                       | <i>T. philomelus/ E. rubecula</i> | 84.00                            | 84.50 | 84.24  | -      | -     | -     |
|                       | <b><i>Turdus spp.</i></b>         | 84.10                            | 84.24 | 84.17  | -      | -     | -     |
| <b>Soricidae</b>      | <i>Sorex sp.</i>                  | 81.16<br>(80.5*)                 | 81.44 | 81.32° | -      | -     | -     |
|                       | <i>C. leucodon</i>                | na                               | na    | 82.70  | -      | -     | -     |
|                       | <i>C. suaveolens</i>              | 81.10                            | 81.20 | 81.15  | -      | -     | -     |
|                       | <b>Muridea</b>                    | <i>Apodemus sp.</i> <sup>#</sup> | 82.2  | 82.84  | 82.37  | -     | -     |
|                       | <b><i>C. griseus</i></b>          | na                               | na    | 82.40  |        |       |       |
| <b>Caprinae</b>       | <i>O. aries</i>                   | na                               | na    | 77     | na     | na    | 82.9  |
|                       | <i>R. rupicapra</i>               | na                               | na    | 77.1   | na     | na    | 81.1  |
|                       | <i>C. hircus</i>                  | 77.9                             | 78    | 77.95  | -80.86 | -80.9 | 80.99 |

\* a single amplicon showed this low  $T_m$ .

° the lowest  $T_m$  was not used to compute the mean  $T_m$ .

# deviating melting temperature for *Apodemus* amplicons with deletions and mutated positions are not included in that calculation of  $T_m$  (see Additional file 3).
