# Supplementary material for: Identification of Ixodes ricinus blood meals using an automated protocol with high resolution melting analysis (HRMA) reveals the importance of domestic dogs as larval tick hosts in Italian alpine forests
Source: Springer Nature journal article supplement (doi:10.1186/s13071-016-1901-y), 2016-12-01
Supplement: MOESM2 [file 13071_2016_1901_MOESM2_ESM.pdf]

## Additional file 2.

Table: BLASTn search results for HRM\_Cer *Ovis* spp. amplicons, showing the lack of a reliable amplicon species/subspecies identity assignment given the high (100-99%) and equal identity score resulting for different *Ovis* spp..

| HRM_Cer amplicon from<br>engorged female from mouflon | BLASTn: Sequences producing<br>significant alignments | Max<br>score | Total<br>score | Query<br>cover | e-value | Ident<br>% |
|-------------------------------------------------------|-------------------------------------------------------|--------------|----------------|----------------|---------|------------|
| IRH000213                                             | <i>Ovis orientalis</i> breed Asian mouflon            | 302          | 302            | 100            | 1E-78   | 100        |
|                                                       | <i>Ovis aries</i> breed Jingzhong                     | 302          | 302            | 100            | 1E-78   | 100        |
|                                                       | <i>Ovis aries</i>                                     | 302          | 302            | 100            | 1E-78   | 100        |
|                                                       | <i>Ovis aries</i>                                     | 302          | 302            | 100            | 1E-78   | 100        |
|                                                       | <i>Ovis aries musimon</i>                             | 302          | 302            | 100            | 1E-78   | 100        |
| <b>HRM_Cer amplicons from<br/>questing nymphs</b>     |                                                       |              |                |                |         |            |
| IRQ52013_Mez                                          | <i>Ovis aries musimon</i>                             | 300          | 300            | 100            | 5E-78   | 100        |
|                                                       | <i>Ovis aries</i>                                     | 298          | 298            | 99             | 2E-77   | 100        |
|                                                       | <i>Ovis aries</i>                                     | 298          | 298            | 99             | 2E-77   | 100        |
|                                                       | <i>Ovis aries</i>                                     | 298          | 298            | 99             | 2E-77   | 100        |
|                                                       | <i>Ovis orientalis</i> breed Asian mouflon            | 294          | 294            | 100            | 2E-76   | 99         |
| IRQ52513_Mez                                          | <i>Ovis orientalis</i> breed Asian mouflon            | 303          | 303            | 100            | 4E-79   | 100        |
|                                                       | <i>Ovis aries</i> breed Jingzhong                     | 303          | 303            | 100            | 4E-79   | 100        |
|                                                       | <i>Ovis aries</i>                                     | 303          | 303            | 100            | 4E-79   | 100        |
|                                                       | <i>Ovis aries</i>                                     | 303          | 303            | 100            | 4E-79   | 100        |
|                                                       | <i>Ovis aries musimon</i>                             | 303          | 303            | 100            | 4E-79   | 100        |
| IRQ079212_A_Ala                                       | <i>Ovis orientalis</i> breed Asian mouflon            | 296          | 296            | 100            | 6E-77   | 99         |
|                                                       | <i>Ovis aries</i> breed Jingzhong                     | 296          | 296            | 100            | 6E-77   | 99         |
|                                                       | <i>Ovis aries</i>                                     | 296          | 296            | 100            | 6E-77   | 99         |
|                                                       | <i>Ovis aries</i>                                     | 296          | 296            | 100            | 6E-77   | 99         |
|                                                       | <i>Ovis aries musimon</i>                             | 296          | 296            | 100            | 6E-77   | 99         |
| IRQ15013_Vge                                          | <i>Ovis orientalis</i> breed Asian                    | 302          | 302            | 100            | 1E-78   | 100        |
|                                                       | <i>Ovis aries</i> breed Jingzhong                     | 302          | 302            | 100            | 1E-78   | 100        |
|                                                       | <i>Ovis aries</i>                                     | 302          | 302            | 100            | 1E-78   | 100        |
|                                                       | <i>Ovis aries</i>                                     | 302          | 302            | 100            | 1E-78   | 100        |
|                                                       | <i>Ovis aries musimon</i>                             | 302          | 302            | 100            | 1E-78   | 100        |
| IRQ059412_Pin                                         | <i>Ovis ammon hodgsoni</i>                            | 303          | 303            | 100            | 4E-79   | 100        |
|                                                       | <i>Ovis aries ophion</i>                              | 298          | 298            | 100            | 2E-77   | 99         |
|                                                       | <i>Ovis orientalis</i> breed Asian mouflon            | 298          | 298            | 100            | 2E-77   | 99         |
|                                                       | <i>Ovis aries</i> breed Jingzhong                     | 298          | 298            | 100            | 2E-77   | 99         |
|                                                       | <i>Ovis aries</i>                                     | 298          | 298            | 100            | 2E-77   | 99         |
|                                                       | <i>Ovis orientalis anatolica</i>                      | 298          | 298            | 100            | 2E-77   | 99         |

According to Taxonomy and Genbank NCBI database, the following synonyms refer to mouflon (*Ovis aries musimon* Pallas, 1811): *Ovis orientalis musimon*; *Ovis aries mufflon*; *Ovis musimon*; *Ovis gmelini*; *Ovis ammon musimon*.

Alignment (next page): *Ovis* spp. mtDNA *control region* sequences retrieved from GenBank (BG-1 to 13), with the corresponding GenBank taxonomic identity, and *Ovis* spp. amplicons generated with the primer set HRM\_Cer (IRH000213 amplicon from engorged tick collected from a wild sheep; IRQxxxxx amplicons from questing nymphs), together with one *Capreolus capreolus* (IRQ02713) and one *Cervus elaphus* (IRQ039412) amplicons from questing nymphs obtained in this study.

The alignment shows the lack of mutation in the amplified fragment such as to permit the discrimination between *Ovis aries* and its subspecies, justifying the BLASTn search results reported in the previous Table. Additionally, the alignment underline the high intraspecific variability in *Ovis aries* and the lack of defined interspecific mutations compared to *C. capreolus* and *C. elaphus*, explaining the complexity in HRMA amplicons identification with the HRM\_Cer primer set.

```

GB-1_O.aries_Z35264      CGATGGACTAATGACTAATCAGCCCATGCCTA-ACATAACAGTGGTGTGCATGATTTGGTATTTTTTAAT
GB-2_O.aries_Z35258      .....-.....T.....
GB-3_O.aries_musimon_GU350335 .....-.....T.....
GB-4_O.aries_Z35240      .....-.....T.....
GB-5_O.aries_Z35233      .....-.....T.....
GB-6_O.aries_Z35267      .....-.....T.....
GB-7_O.aries_musimon_GU350328 .....-.....T.....
IRQ52513                  .....-.....T.....
IRQ52013                  .....-.....T.....
GB-8_O.aries_musimon_AF039579 .....-.....T.....
GB-9_O.aries_musimon_AY091487 .....-.....T.....
GB-10_O.aries_musimon_HM236184 .....-.....T.....
IRQ15013                  .....-.....T.....
IRH000213                 .....-.....T.....
IRQ071212_A              .....-.....T.....
IRQ059412                 .....-.....T.....
GB-11_O.aries_ophion_KF312238 .....-.....T.....
GB-12_O.aries_Z35249      .....-.....T.....
GB-13_O.aries_AB006801    .....G.....A.....TC.C.....T...C.....A.....
IRQ02713_C.capreolus     .....TC.C.....T.....A.....
IRQ039412_C.elaphus      .....TC.C.....T.....A.....A.....A.T.
Clustal Consensus        ***** ***** * ***** ** ***** ***** ***** *

```

```

GB-1_O.aries_Z35264      TTTTGGGG-ATGCTTGACTCAGCTATGGCCGTCTG-AGGCCCGACCCGGAGCATGAATTGTAGCTGGA
GB-2_O.aries_Z35258      .....-.....T.....
GB-3_O.aries_musimon_GU350335 .....-.....T.....
GB-4_O.aries_Z35240      .....-.....AG.....
GB-5_O.aries_Z35233      .....-.....AG.....
GB-6_O.aries_Z35267      .....-.....AG.....
GB-7_O.aries_musimon_GU350328 .....-.....AG.....
IRQ52513                  .....-.....AG.....
IRQ52013                  .....-.....AG.....
GB-8_O.aries_musimon_AF039579 .....-.....AG.....
GB-9_O.aries_musimon_AY091487 .....-.....AG.....
GB-10_O.aries_musimon_HM236184 .....-.....AG.....
IRQ15013                  .....-.....AG.....
IRH000213                 .....-.....AG.....
IRQ071212_A              .....-.....AG.....
IRQ059412                 .....-.....AG.....
GB-11_O.aries_ophion_KF312238 .....-.....AG.....
GB-12_O.aries_Z35249      .....-.....AG.....
GB-13_O.aries_AB006801    G.C.....A.A.....T.....T.....G
IRQ02713_C.capreolus     .....G.....AA.....A.....
IRQ039412_C.elaphus      ...G...G.....A...A.....G...T...T.....
Clustal Consensus        * **** ***** ** * * * * * * * * * * * * * * * * * * * * * * * *

```

```

GB-1_O.aries_Z35264      CTTAACTGCATCTTGAGCATCCTCATAAT
GB-2_O.aries_Z35258      .....
GB-3_O.aries_musimon_GU350335 .....
GB-4_O.aries_Z35240      .....
GB-5_O.aries_Z35233      .....
GB-6_O.aries_Z35267      .....
GB-7_O.aries_musimon_GU350328 .....C.....
IRQ52513                  .....C...--
IRQ52013                  .....C...--
GB-8_O.aries_musimon_AF039579 .....C.....
GB-9_O.aries_musimon_AY091487 .....C.....
GB-10_O.aries_musimon_HM236184 .....C.....
IRQ15013                  .....C...--
IRH000213                 .....C...--
IRQ071212_A              .....C.....C...--
IRQ059412                 .....C...--
GB-11_O.aries_ophion_KF312238 .....
GB-12_O.aries_Z35249      .....
GB-13_O.aries_AB006801    .....AC.....
IRQ02713_C.capreolus     .....C...--
IRQ039412_C.elaphus      .....C...--
Clustal Consensus        ***** ***** **

```
