# Supplementary material for: Identification of Ixodes ricinus blood meals using an automated protocol with high resolution melting analysis (HRMA) reveals the importance of domestic dogs as larval tick hosts in Italian alpine forests
Source: Springer Nature journal article supplement (doi:10.1186/s13071-016-1901-y), 2016-12-01
Supplement: MOESM3 [file 13071_2016_1901_MOESM3_ESM.pdf]

## **Additional file 2.**

Sequence alignment of mtDNA *control region* amplicons generated with the primer set HRM\_Rod [11]. IRH control samples sequence; IRQ questing nymphs sequence. Sequences 1-13: *Apodemus* spp.; 9 -13 *Apodemus* spp. amplicons (as resulting from BLASTn search) with deletions and mutations resulting in a deviating melting pattern leading to misidentification by HRMA as *M. glareolus*; 14-15: *M. glareolus* amplicons. Reported are also melting temperature, in bold refer to QIAgen extracted samples, while normal to ThermoScientific extracted samples.

|                    |                                                                         |       |       |       |       |       |       |
|--------------------|-------------------------------------------------------------------------|-------|-------|-------|-------|-------|-------|
|                    | 10                                                                      | 20    | 30    | 40    | 50    | 60    | 70    |
| 1-IRH_A.flavicolis | CTGGTTCTTACTTCAGGGCCATCAAATGCGTTATC-GCCCATACGTTCCCCCTTAAATAAGACATCTCG-A |       |       |       |       |       |       |
| 2-IRQ              | .....                                                                   | ..... | ..... | ..... | ..... | ..... | ..... |
| 3-IRQ              | .....                                                                   | ..... | ..... | ..... | ..... | ..... | ..... |
| 4-IRQ              | .....                                                                   | ..... | ..... | ..... | ..... | ..... | ..... |
| 5-IRQ              | .....                                                                   | ..... | ..... | ..... | ..... | ..... | ..... |
| 6-IRQ              | .....                                                                   | ..... | ..... | ..... | ..... | ..... | ..... |
| 7-IRQ              | .....                                                                   | ..... | ..... | ..... | ..... | ..... | ..... |
| 8-IRQ              | .....                                                                   | ..... | ..... | ..... | ..... | ..... | ..... |
| 9-IRQ              | .....                                                                   | ..... | ..... | ..... | ..... | ..... | ..... |
| 10-IRQ             | .....                                                                   | ..... | ..... | ..... | ..... | ..... | ..... |
| 11-IRQ             | .....                                                                   | ..... | ..... | ..... | ..... | ..... | ..... |
| 12-IRQ             | .....                                                                   | ..... | ..... | ..... | ..... | ..... | ..... |
| 13-IRQ             | .....                                                                   | ..... | ..... | ..... | ..... | ..... | ..... |
| 14-IRH_M.glareolus | .....                                                                   | ..... | ..... | ..... | ..... | ..... | ..... |
| 15-IRQ             | .....                                                                   | ..... | ..... | ..... | ..... | ..... | ..... |
| Clustal Consensus  | ****                                                                    | ****  | ***** | *     | ***** | ***** | *     |

|                    |                                                                     |       |       |       |       |       |       |
|--------------------|---------------------------------------------------------------------|-------|-------|-------|-------|-------|-------|
|                    | 80                                                                  | 90    | 100   | 110   | 120   | 130   | 140   |
| 1-IRH_A.flavicolis | TGGTACGGGTCTAATCAGCCAAGACTTC-CATAACTGTGGTCTCGGGCAGTTGGTATTTTTTATTTT |       |       |       |       |       |       |
| 2-IRQ              | .....                                                               | ..... | ..... | ..... | ..... | ..... | ..... |
| 3-IRQ              | .....                                                               | ..... | ..... | ..... | ..... | ..... | ..... |
| 4-IRQ              | .....                                                               | ..... | ..... | ..... | ..... | ..... | ..... |
| 5-IRQ              | .....                                                               | ..... | ..... | ..... | ..... | ..... | ..... |
| 6-IRQ              | .....                                                               | ..... | ..... | ..... | ..... | ..... | ..... |
| 7-IRQ              | .....                                                               | ..... | ..... | ..... | ..... | ..... | ..... |
| 8-IRQ              | .....                                                               | ..... | ..... | ..... | ..... | ..... | ..... |
| 9-IRQ              | .....                                                               | ..... | ..... | ..... | ..... | ..... | ..... |
| 10-IRQ             | .....                                                               | ..... | ..... | ..... | ..... | ..... | ..... |
| 11-IRQ             | .....                                                               | ..... | ..... | ..... | ..... | ..... | ..... |
| 12-IRQ             | .....                                                               | ..... | ..... | ..... | ..... | ..... | ..... |
| 13-IRQ             | .....                                                               | ..... | ..... | ..... | ..... | ..... | ..... |
| 14-IRH_M.glareolus | .....                                                               | ..... | ..... | ..... | ..... | ..... | ..... |
| 15-IRQ             | .....                                                               | ..... | ..... | ..... | ..... | ..... | ..... |
| Clustal Consensus  | *****                                                               | ***** | *     | *     | *     | *     | ***** |

|                    |                                      |       |       |                           |
|--------------------|--------------------------------------|-------|-------|---------------------------|
|                    | 150                                  | 160   | 170   | <b>T<sub>m</sub> (°C)</b> |
| 1-IRH_A.flavicolis | GGATGCTGTGACTCAGCATAGCCGTC AAGCATGAA |       |       | <b>81.9</b>               |
| 2-IRQ              | .....                                | ..... | ..... | <b>81.90</b>              |
| 3-IRQ              | .....                                | ..... | ..... | <b>81.50</b>              |
| 4-IRQ              | .....                                | ..... | ..... | 82.06 <sup>a</sup>        |
| 5-IRQ              | .....                                | ..... | ..... | 82.20                     |
| 6-IRQ              | .....                                | ..... | ..... | 82.44                     |
| 7-IRQ              | .....                                | ..... | ..... | 82.40                     |
| 8-IRQ              | .....                                | ..... | ..... | 82.46                     |
| 9-IRQ              | .....                                | ..... | ..... | 82.00                     |
| 10-IRQ             | .....                                | ..... | ..... | <b>81.30</b>              |
| 11-IRQ             | .....                                | ..... | ..... | 81.10                     |
| 12-IRQ             | .....                                | ..... | ..... | 81.34                     |
| 13-IRQ             | .....                                | ..... | ..... | 82.00                     |
| 14-IRH_M.glareolus | .....                                | ..... | ..... | <b>81.12</b>              |
| 15-IRQ             | .....                                | ..... | ..... | <b>81.00</b>              |
| Clustal Consensus  | *****                                | *     | *     | *****                     |

<sup>a</sup> despite no mutation this sample showed a lower melting temperature than reference samples, possibly because of abnormal condition in the HRMA run.
